# Supplementary material for: Doping effect on a two-electron silver nanocluster
Source: Royal Society of Chemistry journal article supplement (doi:10.1039/d4nr00326h), 2024-01-01
Supplement: d4nr00326h1.pdf [file d4nr00326h1.pdf]

## Supplementary Information

### Doping effect on a two-electron silver nanocluster

Wei-Jung Yen,<sup>a</sup> Jian-Hong Liao,<sup>a</sup> Tzu-Hao Chiu,<sup>a</sup> Jie-Ying Chen,<sup>b</sup> Yuan Jang Chen,<sup>b</sup>

Samia Kahlal,<sup>c</sup> Jean-Yves Saillard<sup>\*c</sup> and C. W. Liu <sup>\*a</sup>

<sup>a</sup> *Department of Chemistry, National Dong Hwa University, Hualien 97401, Taiwan*

*(Republic of China). Email: chenwei@gms.ndhu.edu.tw Homepage:*

*<http://faculty.ndhu.edu.tw/~cwl/index.htm>*

<sup>b</sup> *Department of Chemistry, Fu-Jen Catholic University, New Taipei City 24205,*

*Taiwan (Republic of China)*

<sup>c</sup> *Univ Rennes, CNRS, ISCR-UMR 6226, F-35000 Rennes, France. Email: jean-*

*yves.saillard@univ-rennes.fr*

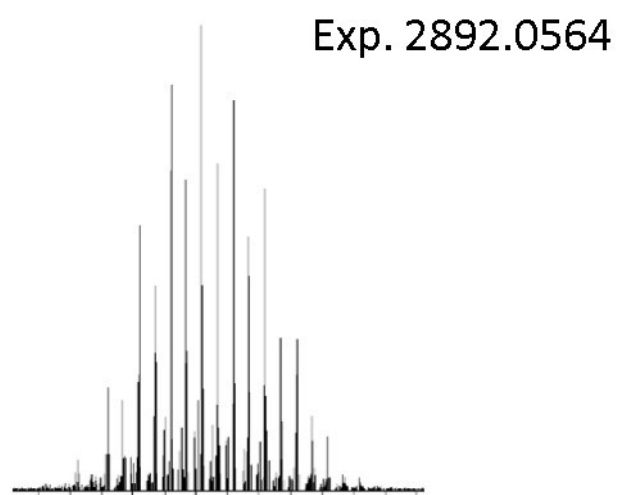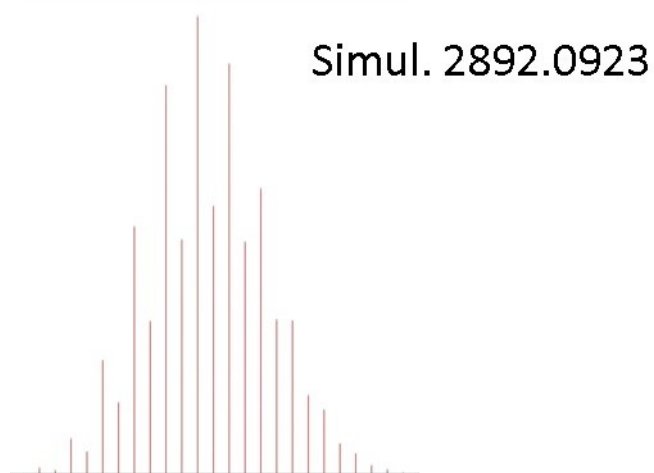

**Fig. S1** The experimental (top) and simulated isotope distribution pattern of  $[\text{Ag}_{11}\{\text{S}_{2\text{P}}(\text{O}^i\text{Pr})_2\}_8]$  in the ESI-MS of  $\text{Cu}_x\text{Ag}_{11-x}$ .

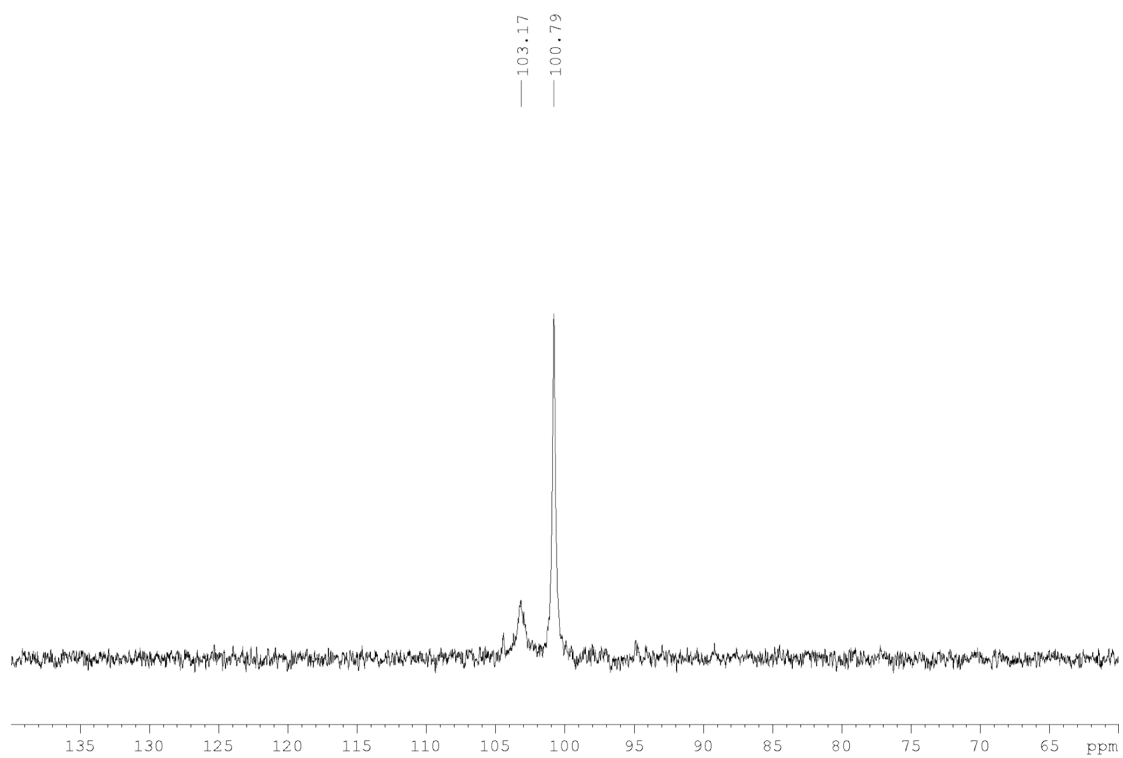

**Fig. S2** The  $^{31}\text{P}\{^1\text{H}\}$  NMR spectrum of **Ag<sub>11</sub>** (in  $\text{CDCl}_3$ ).

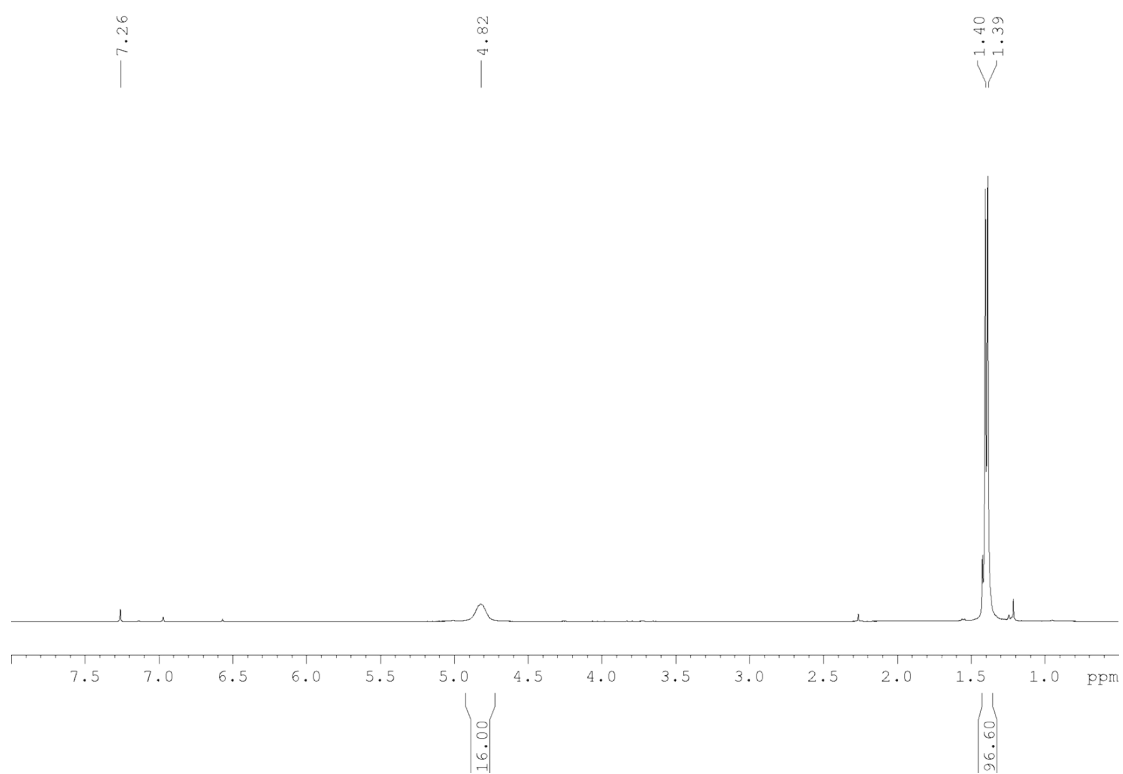

**Fig. S3** The  $^1\text{H}$  NMR spectrum of **Ag<sub>11</sub>** (in  $\text{CDCl}_3$ ).

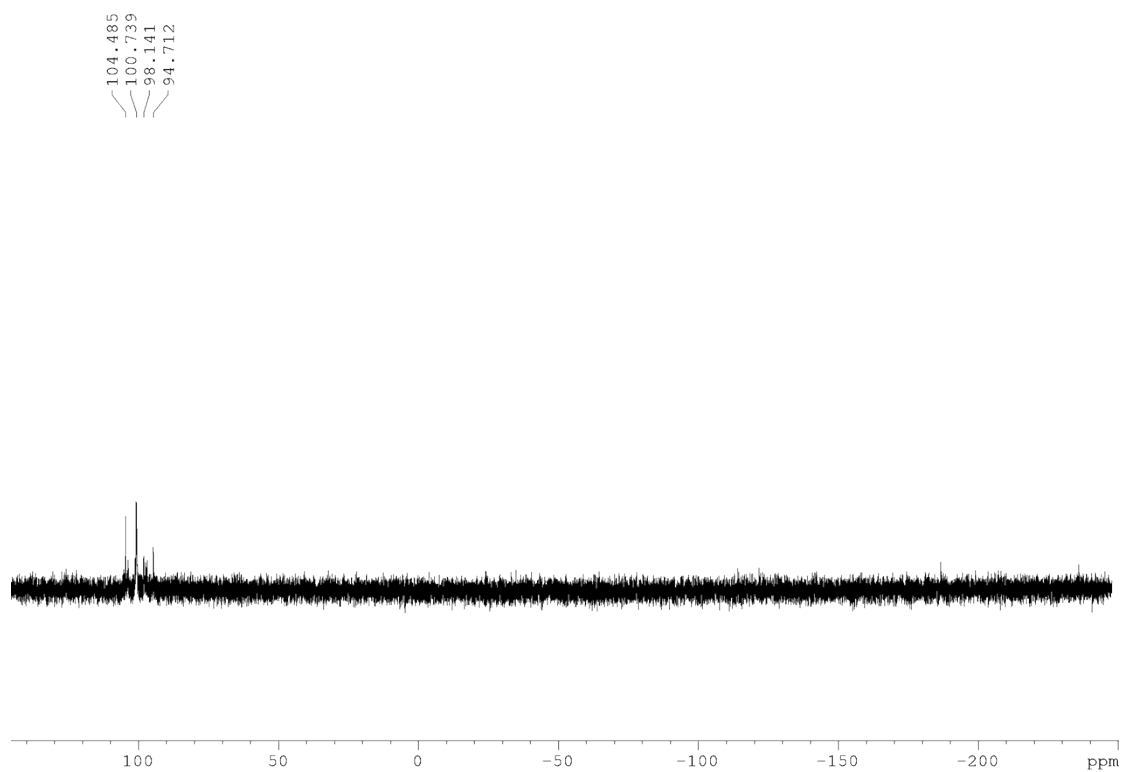

**Fig. S4** The  $^{31}\text{P}\{^1\text{H}\}$  NMR spectrum of  $\text{Cu}_x\text{Ag}_{11-x}$  (in  $\text{CDCl}_3$ ).

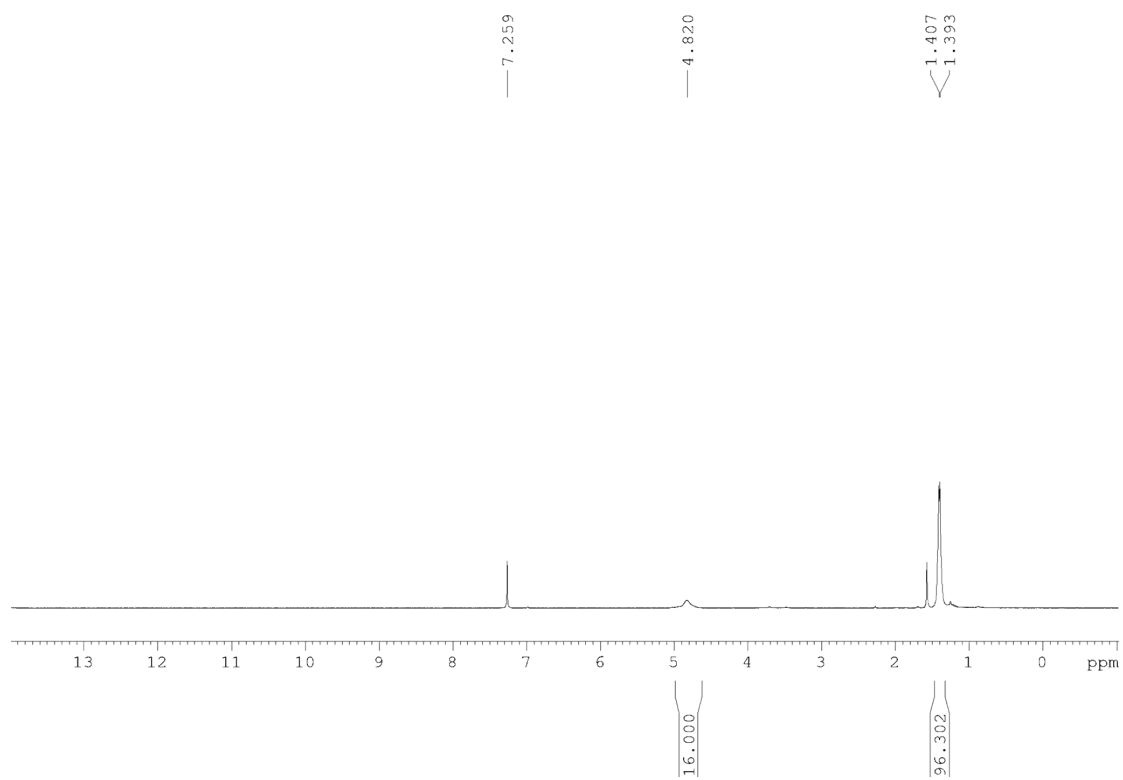

**Fig. S5** The  $^1\text{H}$  NMR spectrum of  $\text{Cu}_x\text{Ag}_{11-x}$  (in  $\text{CDCl}_3$ ).

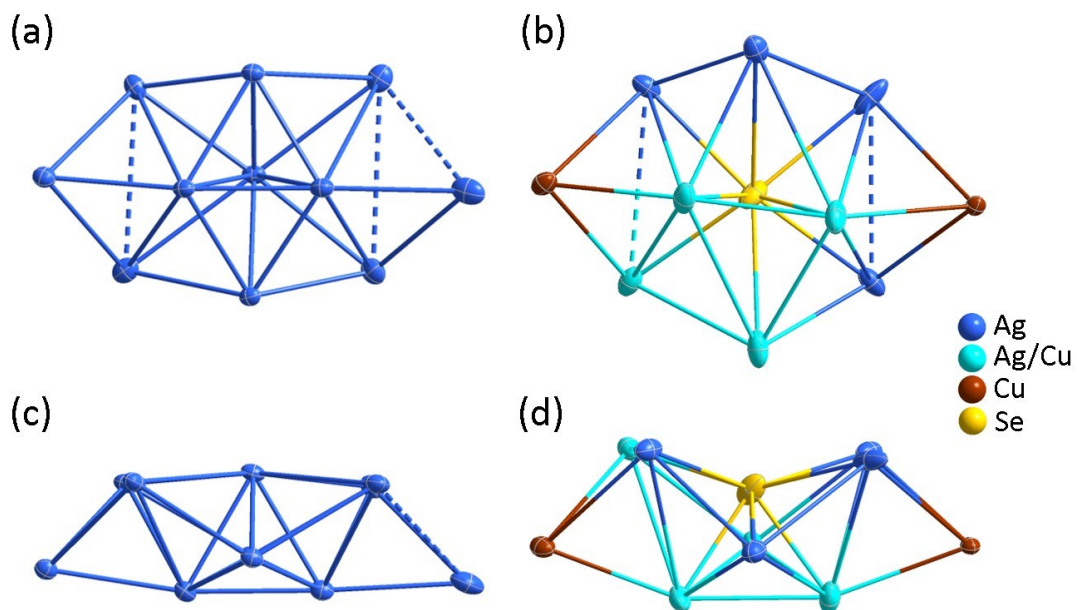

**Fig. S6** (a) The metal framework in  $\text{Ag}_{11}$  and (b)  $[\text{Cu}_x\text{Ag}_{10-x}(\text{Se})\{\text{Se}_2\text{P}(\text{O}^i\text{Pr})_2\}_8]$ . (c) A side view of the metal framework in  $\text{Ag}_{11}$  and (d)  $[\text{Cu}_x\text{Ag}_{10-x}(\text{Se})\{\text{Se}_2\text{P}(\text{O}^i\text{Pr})_2\}_8]$ .

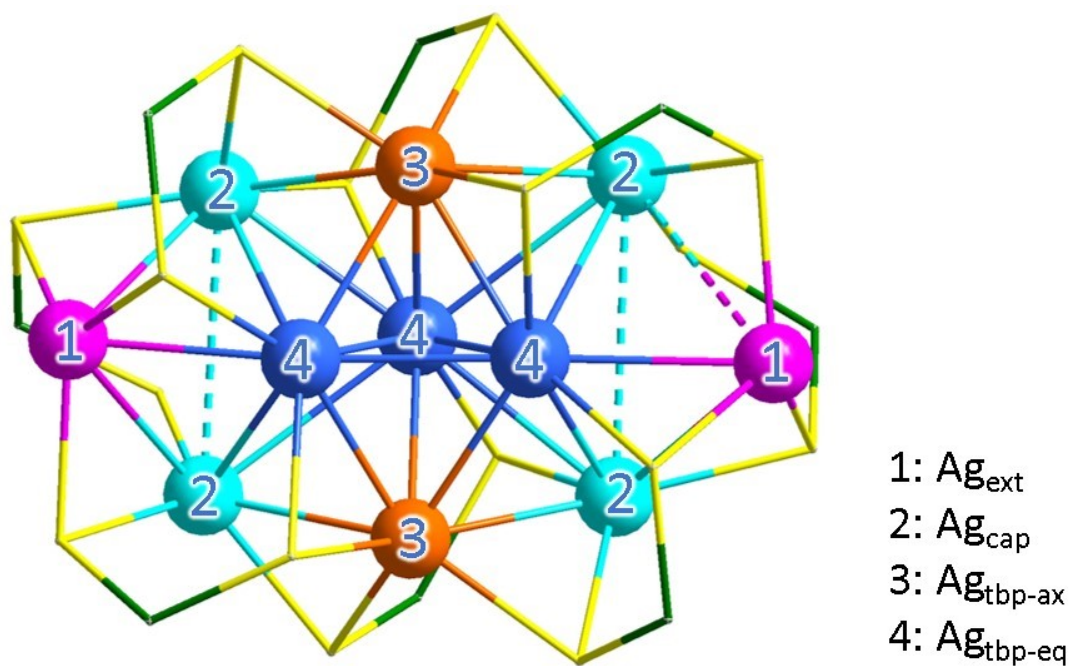

**Fig. S7** A schematic diagram of the replacement of Cu atoms in  $\text{Cu}_x\text{Ag}_{11-x}$ .

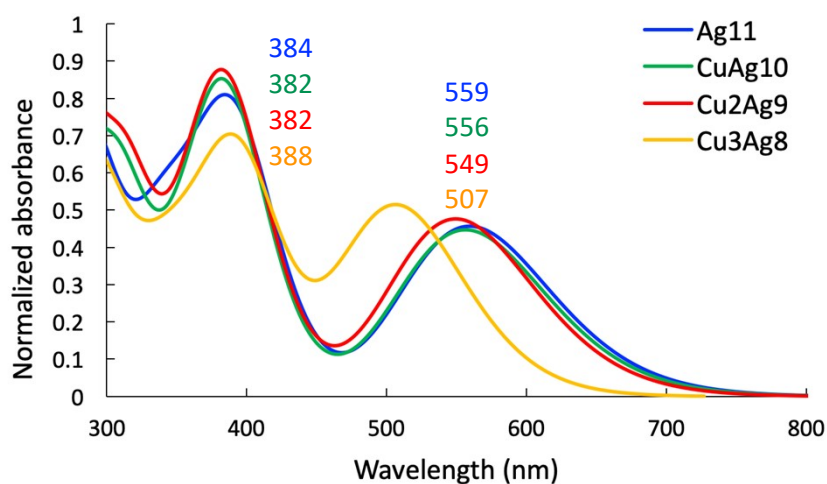

**Fig. S8** The TD-DFT-simulated spectra of **Ag<sub>11</sub>** and the **Cu<sub>x</sub>Ag<sub>(11-x)</sub>** ( $x = 1-3$ ) alloys considered in their configuration of lowest energy (see Figure 4).

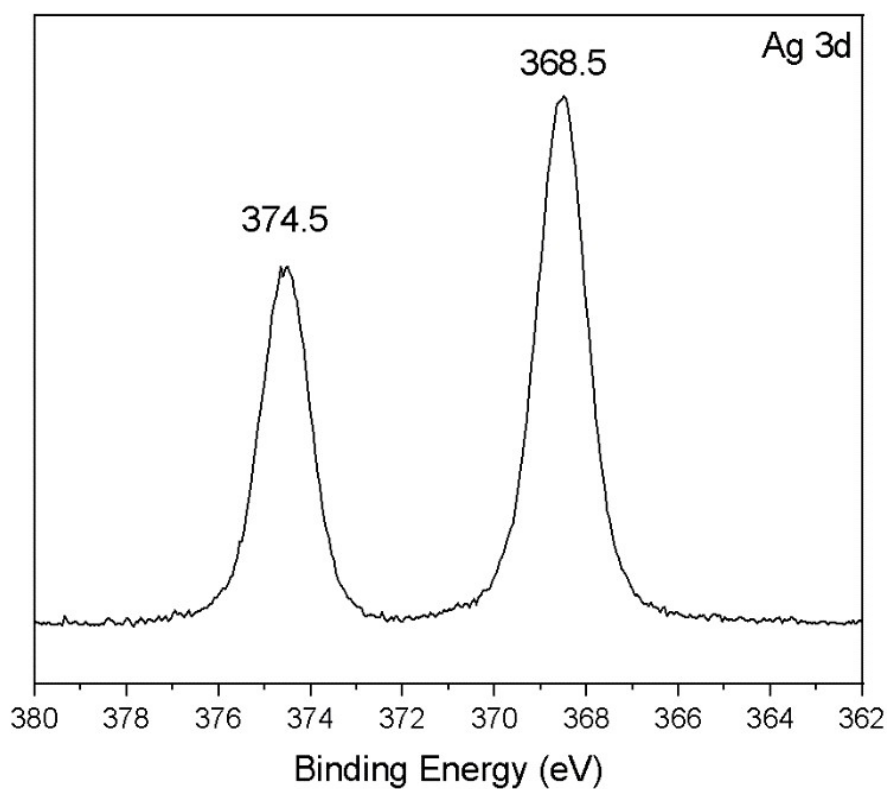

**Fig. S9** Ag 3d XPS spectrum of **Ag<sub>11</sub>**.

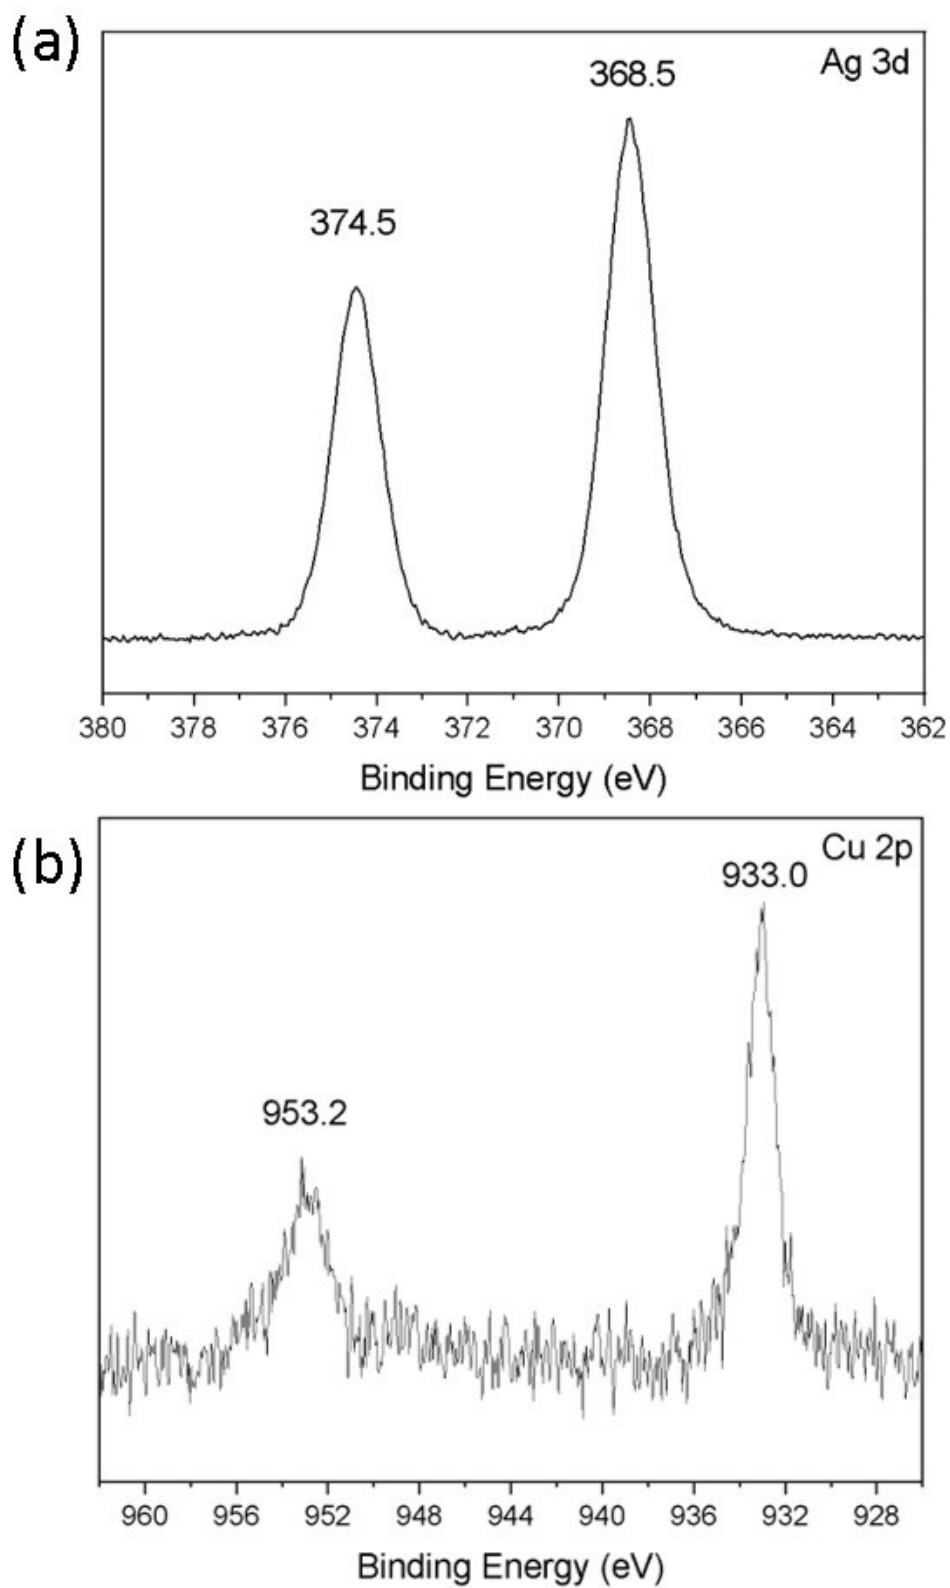

**Fig. S10** (a) Ag 3d and (b) Cu 2p XPS spectra of  $\text{Cu}_x\text{Ag}_{11-x}$ .

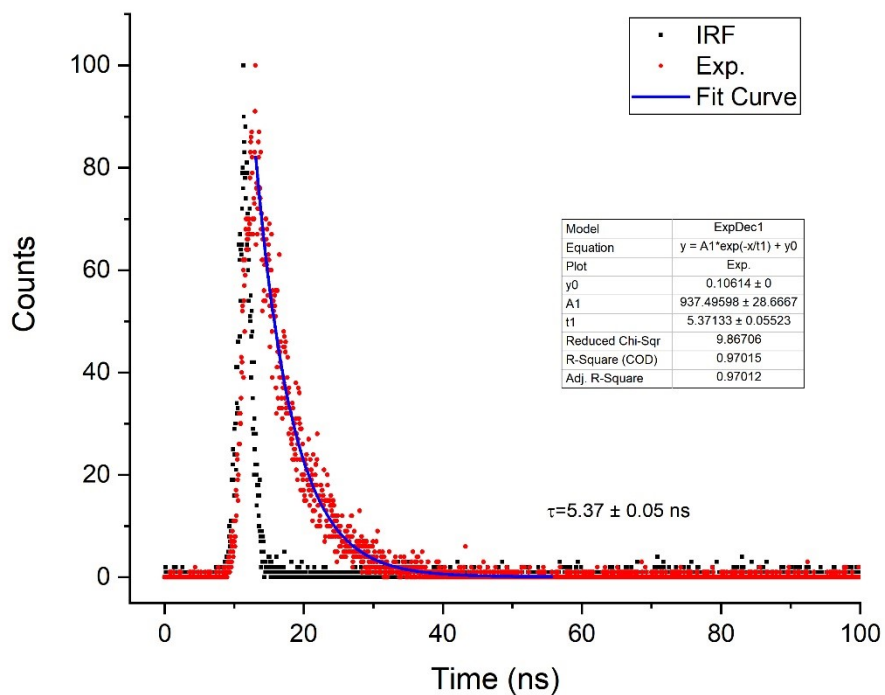

Fig. S11 The photoluminescence decay curve of **Ag<sub>11</sub>** in 2-MeTHF at RT.

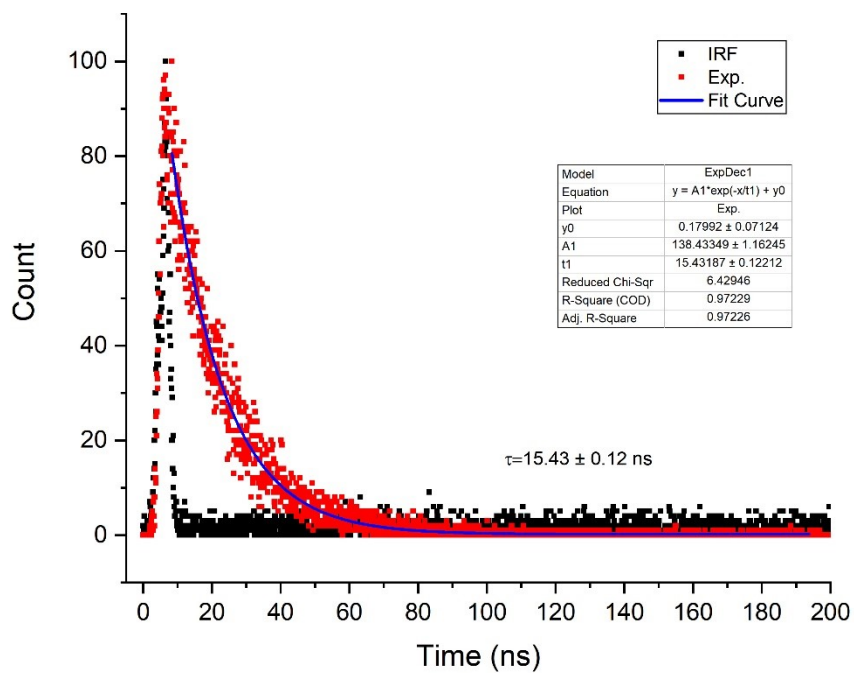

Fig. S12 The photoluminescence decay curve of **Ag<sub>11</sub>** in 2-MeTHF at 77K.



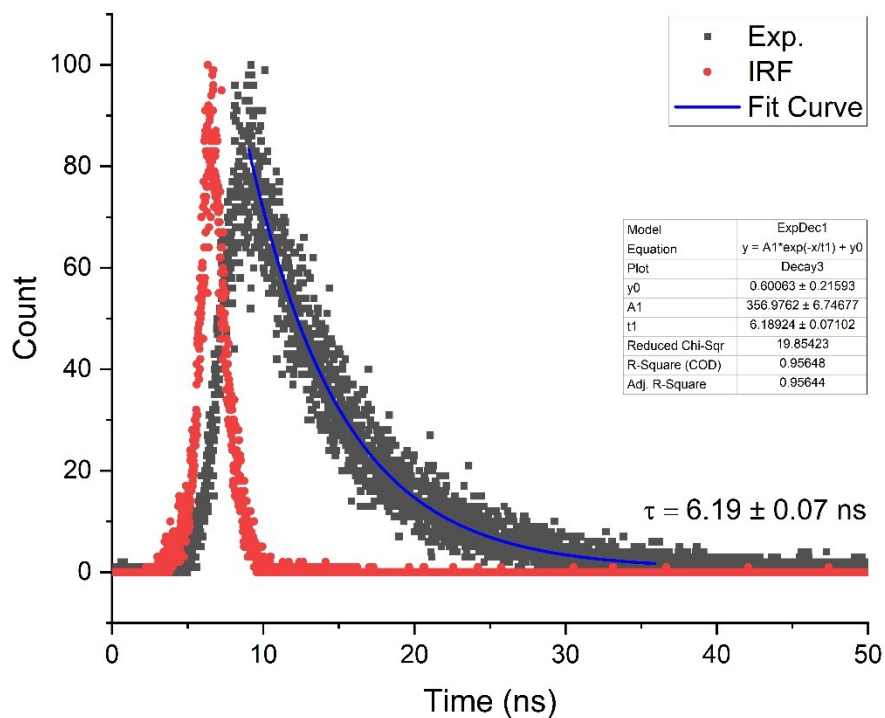

**Fig. S13** The photoluminescence decay curve of  $\text{Cu}_x\text{Ag}_{11-x}$  in 2-MeTHF at RT.

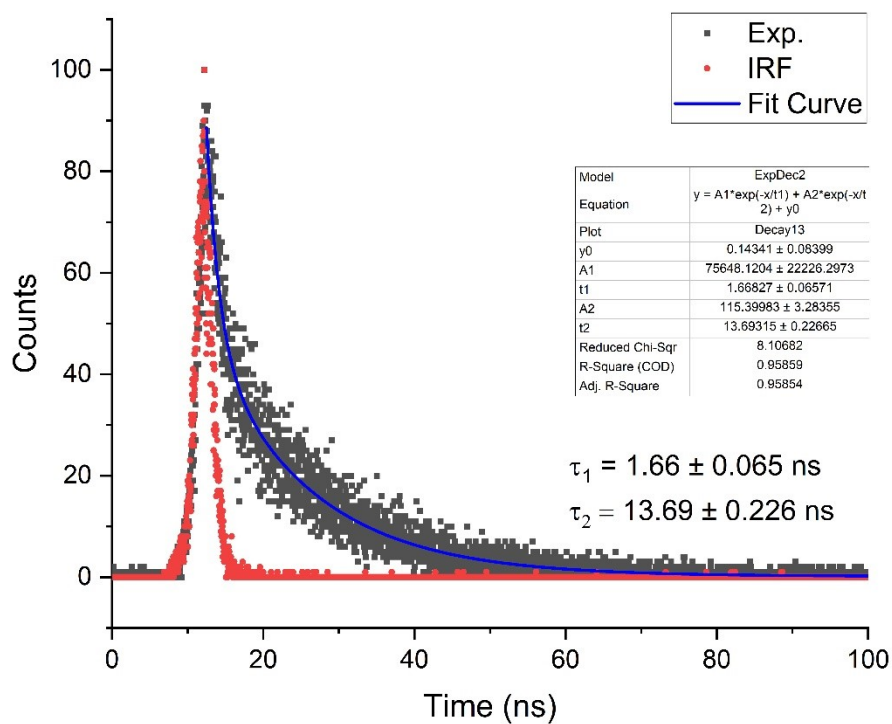

**Fig. S14** The photoluminescence decay curve of  $\text{Cu}_x\text{Ag}_{11-x}$  in 2-MeTHF at 77K.

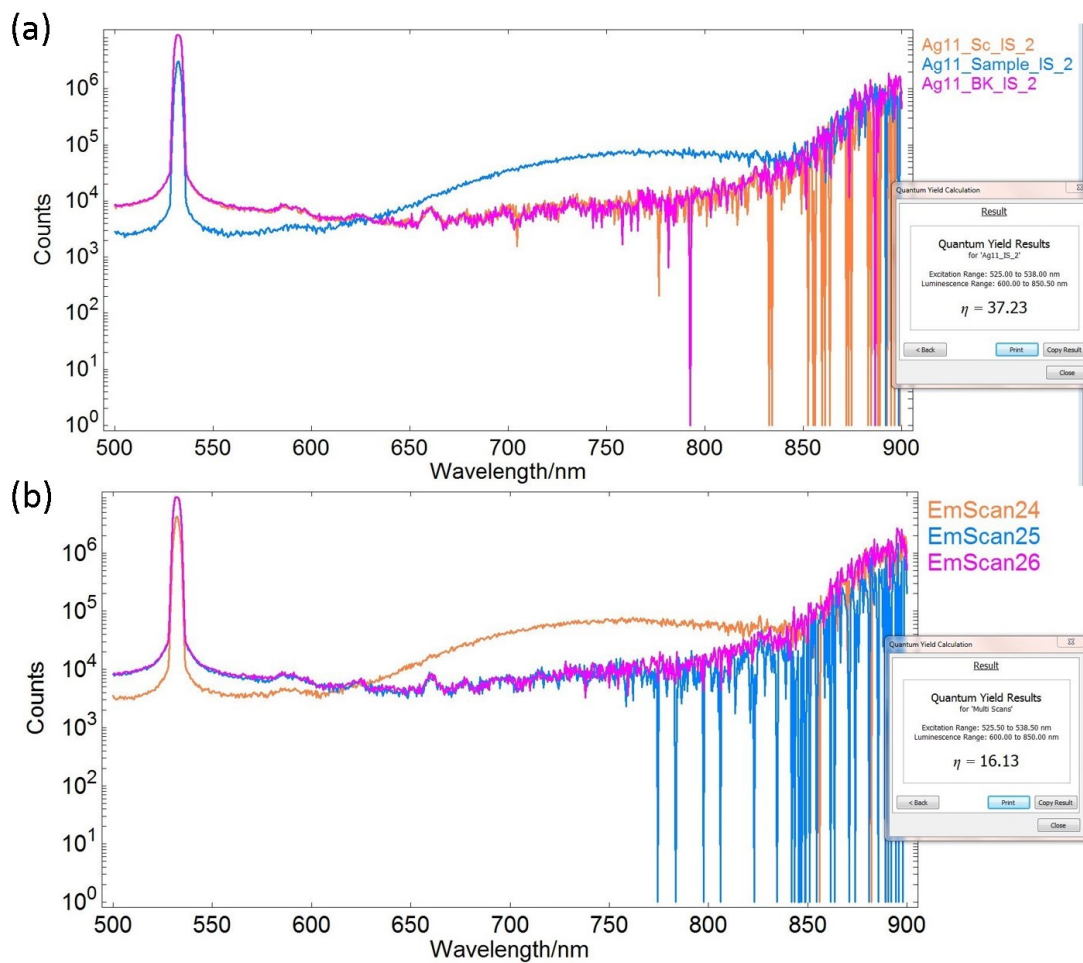

**Fig. S15** (a) The photoluminescence quantum yield of **Ag<sub>11</sub>** and (b) **Cu<sub>x</sub>Ag<sub>11-x</sub>** in film state at ambient temperature.

**Table S1** Selected bond lengths (Å) in **Ag<sub>10</sub>** and **Ag<sub>11</sub>**.

| Compound               | Tetrahedron edge yellow (Å) | Tetrahedron edge green (Å)     | Tetrahedron edge cyan (Å) | Tetrahedron edge magenta (Å) | Tetrahedron height yellow (Å) | Tetrahedron height green (Å) | Tetrahedron height cyan (Å) | Tetrahedron height magenta (Å) |
|------------------------|-----------------------------|--------------------------------|---------------------------|------------------------------|-------------------------------|------------------------------|-----------------------------|--------------------------------|
| <b>Ag<sub>10</sub></b> | 2.7985(13)                  | 2.7848(14)                     | 2.8437(14)                | 2.9116(14)                   | 2.283                         | 2.276                        | 2.334                       | 2.353 <sup>[3]</sup>           |
|                        | 2.8369(13)                  | 2.8369(13)                     | 2.8549(12)                | 3.0570(13)                   | 2.313                         | 2.339                        | 2.382                       | 2.400                          |
|                        | 2.8437(14)                  | 2.8464(12)                     | 2.9567(13)                | 3.0967(15)                   | 2.344                         | 2.343                        | 2.402                       | 2.688                          |
|                        | 2.8464(12)                  | 2.8549(12)                     | 3.0290(13)                | 3.0984(14)                   | 2.377                         | 2.360                        | 2.548                       | 2.731                          |
|                        | 2.8549(12)                  | 2.8896(13)                     | 3.0483(13)                | 3.1355(13)                   | avg. 2.329                    | avg. 2.330                   | avg. 2.417                  | avg. 2.543                     |
|                        | 2.9567(13)                  | 2.9192(13)                     | 3.0557(13)                | 3.600(1)                     |                               |                              | 2.347                       |                                |
|                        | avg. 2.8562(13)             | avg. 2.8553(13)                | avg. 2.9647(13)           | avg. 3.150(1)                |                               |                              | 2.351                       |                                |
|                        |                             |                                | 2.8549(12)                |                              |                               |                              | 2.418                       |                                |
|                        |                             |                                | 2.8896(13)                |                              |                               |                              | 2.530                       |                                |
|                        |                             |                                | 2.9192(13)                |                              |                               |                              | avg. 2.412                  |                                |
|                        |                             |                                | 2.9565(13)                |                              |                               |                              | 2.283                       |                                |
|                        |                             |                                | 3.0193(14)                |                              |                               |                              | 2.356                       |                                |
|                        |                             |                                | 3.1315(15)                |                              |                               |                              | 2.376                       |                                |
|                        |                             |                                | avg. 2.9618(13)           |                              |                               |                              | 2.437                       |                                |
|                        |                             |                                | 2.7985(13)                |                              |                               |                              | avg. 2.363                  |                                |
|                        |                             |                                | 2.8366(13)                |                              |                               |                              | 2.309                       |                                |
|                        |                             |                                | 2.8464(12)                |                              |                               |                              | 2.340                       |                                |
|                        |                             | 2.9518(15)                     |                           |                              |                               | 2.389                        |                             |                                |
|                        |                             | 2.9567(13)                     |                           |                              |                               | 2.577                        |                             |                                |
|                        |                             | 3.0984(14)                     |                           |                              |                               | avg. 2.404                   |                             |                                |
|                        |                             | avg. 2.9147(13)                |                           |                              |                               | avg. 2.399 <sup>[2]</sup>    |                             |                                |
|                        |                             | 2.7848(14)                     |                           |                              |                               |                              |                             |                                |
|                        |                             | 2.8464(12)                     |                           |                              |                               |                              |                             |                                |
|                        |                             | 2.9192(13)                     |                           |                              |                               |                              |                             |                                |
|                        |                             | 2.9849(14)                     |                           |                              |                               |                              |                             |                                |
|                        |                             | 3.0685(14)                     |                           |                              |                               |                              |                             |                                |
|                        |                             | 3.1355(13)                     |                           |                              |                               |                              |                             |                                |
|                        |                             | avg. 2.9566(13)                |                           |                              |                               |                              |                             |                                |
|                        |                             | avg. 2.9495(13) <sup>[1]</sup> |                           |                              |                               |                              |                             |                                |
| <b>Ag<sub>11</sub></b> | 2.7917(7)                   | 2.7686(7)                      | 2.7686(7)                 | 3.0098(9)                    | 2.291                         | 2.277                        | 2.268                       | 2.289                          |
|                        | 2.8017(7)                   | 2.8326(7)                      | 2.8407(7)                 | 3.0758(8)                    | 2.301                         | 2.316                        | 2.323                       | 2.619 <sup>[3]</sup>           |
|                        | 2.8326(7)                   | 2.8365(7)                      | 2.9080(7)                 | 3.2166(8)                    | 2.307                         | 2.317                        | 2.449                       | 2.834                          |
|                        | 2.8365(7)                   | 2.8407(7)                      | 3.0136(8)                 | 3.3783(9)                    | 2.351                         | 2.351                        | 2.699                       | 2.970                          |
|                        | 2.8407(7)                   | 2.8453(7)                      | 3.2026(8)                 | 3.4723(8)                    | avg. 2.313                    | avg. 2.315                   | avg. 2.435                  | avg. 2.678                     |
|                        | 2.9003(7)                   | 2.9080(7)                      | 3.2957(8)                 | 3.9802(9)                    |                               |                              | 2.303                       | 2.375 <sup>[3]</sup>           |
|                        | avg. 2.8339(7)              | avg. 2.8386(7)                 | avg. 3.0049(8)            | avg. 3.3555(9)               |                               |                              | 2.347                       | 2.386                          |
|                        |                             |                                | 2.8017(7)                 | 2.9219(7)                    |                               |                              | 2.379                       | 2.718                          |
|                        |                             |                                | 2.8407(7)                 | 3.0787(7)                    |                               |                              | 2.547                       | 2.848                          |
|                        |                             |                                | 2.9003(7)                 | 3.1093(8)                    |                               |                              | avg. 2.394                  | avg. 2.582                     |
|                        |                             |                                | 2.9507(8)                 | 3.2026(8)                    |                               |                              | 2.280                       | avg. 2.630 <sup>[4]</sup>      |
|                        |                             |                                | 3.0514(8)                 | 3.2170(7)                    |                               |                              | 2.335                       |                                |
|                        |                             |                                | 3.1093(8)                 | 3.7852(9)                    |                               |                              | 2.433                       |                                |
|                        |                             |                                | avg. 2.9424(8)            | avg. 3.2191(8)               |                               |                              | 2.706                       |                                |
|                        |                             |                                | 2.8326(7)                 | avg. 3.2873(8)               |                               |                              | avg. 2.439                  |                                |
|                        |                             |                                | 2.8453(7)                 |                              |                               |                              | 2.302                       |                                |
|                        |                             |                                | 2.9080(7)                 |                              |                               |                              | 2.342                       |                                |
|                        |                             | 2.9155(7)                      |                           |                              |                               | 2.414                        |                             |                                |
|                        |                             | 3.0758(8)                      |                           |                              |                               | 2.549                        |                             |                                |

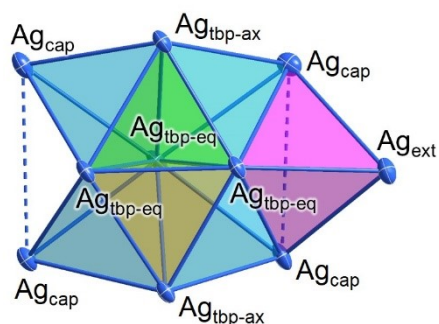

|  |                               |  |  |  |                           |  |
|--|-------------------------------|--|--|--|---------------------------|--|
|  | 3.1519(8)                     |  |  |  | avg. 2.402                |  |
|  | avg. 2.9549(7)                |  |  |  | avg. 2.417 <sup>[2]</sup> |  |
|  | 2.7917(7)                     |  |  |  |                           |  |
|  | 2.8326(7)                     |  |  |  |                           |  |
|  | 2.9003(7)                     |  |  |  |                           |  |
|  | 3.0238(7)                     |  |  |  |                           |  |
|  | 3.2166(8)                     |  |  |  |                           |  |
|  | 3.2907(8)                     |  |  |  |                           |  |
|  | avg. 3.0093(7)                |  |  |  |                           |  |
|  | avg. 2.9778(7) <sup>[1]</sup> |  |  |  |                           |  |

Colored background represents the average bond distances. <sup>[1]</sup> The average bond length of all cyan tetrahedrons. <sup>[2]</sup> The average height of all cyan tetrahedrons. <sup>[3]</sup> Distances from  $Ag_{ext}$  to  $\Delta Ag_{tbp-eq}-Ag_{cap}-Ag_{cap}$ . <sup>[4]</sup> The average height of all magenta tetrahedrons. Red text represents the  $Ag...Ag$  distances are longer than their sum of vdW radii (3.44 Å).

**Table S2** Selected X-ray crystallographic data of **Ag<sub>11</sub>**.

|                                                                                |                                                                                                                                 |
|--------------------------------------------------------------------------------|---------------------------------------------------------------------------------------------------------------------------------|
| Compound                                                                       | <b>Ag<sub>11</sub> · 2(CH<sub>2</sub>Cl<sub>2</sub>)</b>                                                                        |
| CCDC no.                                                                       | 2287343                                                                                                                         |
| Chemical formula                                                               | C <sub>51</sub> H <sub>116</sub> Ag <sub>11</sub> Cl <sub>4</sub> F <sub>3</sub> O <sub>19</sub> P <sub>8</sub> S <sub>17</sub> |
| Formula weight                                                                 | 3211.58                                                                                                                         |
| Wavelength, Å                                                                  | 0.71073                                                                                                                         |
| Crystal System                                                                 | Monoclinic                                                                                                                      |
| Space group                                                                    | <i>P</i> 2 <sub>1</sub> / <i>c</i>                                                                                              |
| a, Å                                                                           | 21.1314(12)                                                                                                                     |
| b, Å                                                                           | 20.6403(11)                                                                                                                     |
| c, Å                                                                           | 25.9515(14)                                                                                                                     |
| α, deg.                                                                        | 90                                                                                                                              |
| β, deg.                                                                        | 110.450(2)                                                                                                                      |
| γ, deg.                                                                        | 90                                                                                                                              |
| V, Å <sup>3</sup>                                                              | 10605.6(10)                                                                                                                     |
| Z                                                                              | 4                                                                                                                               |
| Temperature, K                                                                 | 100(2)                                                                                                                          |
| ρ <sub>calcd</sub> , g/cm <sup>3</sup>                                         | 2.011                                                                                                                           |
| μ, mm <sup>-1</sup>                                                            | 2.596                                                                                                                           |
| θ <sub>max</sub> , deg.                                                        | 25.00                                                                                                                           |
| Completeness, %                                                                | 98.9                                                                                                                            |
| Reflection collected / unique                                                  | 60351 / 18458<br>[ <i>R</i> (int) = 0.0413]                                                                                     |
| Restraints / parameters                                                        | 402 / 1110                                                                                                                      |
| <sup>a</sup> <i>R</i> 1, <sup>b</sup> <i>wR</i> 2 [ <i>I</i> > 2σ( <i>I</i> )] | 0.0426, 0.1023                                                                                                                  |
| <sup>a</sup> <i>R</i> 1, <sup>b</sup> <i>wR</i> 2 (all data)                   | 0.0576, 0.1128                                                                                                                  |
| GOF                                                                            | 1.053                                                                                                                           |
| Largest diff. peak and hole, e/Å <sup>3</sup>                                  | 2.864 and -2.017                                                                                                                |

$$^a R1 = \sum | \square F_o \square - \square F_c \square | / \sum \square F_o \square . \quad ^b wR2 = \{ \sum [w(F_o^2 - F_c^2)^2] / \sum [w(F_o^2)^2] \}^{1/2} .$$

## Measurement of Quantum Yield

The quantum yield of **Ag<sub>11</sub>** and **Cu<sub>x</sub>Ag<sub>11-x</sub>** was determined by a comparative method. Absolute values are calculated by using [Ru(bpy)<sub>3</sub>]<sup>2+</sup> as the standard sample according to the following equation:<sup>S1,S2</sup>

$$\Phi_a = \frac{\frac{F_a}{A_a} \times \eta_a^2}{\frac{F_s}{A_s} \times \eta_s^2} \times \Phi_s$$

Where the subscripts “s” and “a” denote standard and analyte, respectively.  $\Phi$  is the emission quantum yield. F is the integrated emission intensity. A is the absorbance.  $\eta$  is the refractive index of the solvent. The quantum yield for **Ag<sub>11</sub>** was determined by averaging results from three separate experiments, using [Ru(bpy)<sub>3</sub>]<sup>2+</sup> in alcohol as a standard reference. The quantum yield for **Cu<sub>x</sub>Ag<sub>11-x</sub>** was calculated based on an average from two experiments, with [Ru(bpy)<sub>3</sub>]<sup>2+</sup> dissolved in water serving as the standard. To prepare the PMMA film, 2 mg of **Ag<sub>11</sub>** (or 2 mg of **Cu<sub>x</sub>Ag<sub>11-x</sub>**) was mixed with a PMMA solution in CH<sub>2</sub>Cl<sub>2</sub> and stirred until evenly distributed. The mixture solution was then dropped onto a quartz template and left to dry, forming a film.

### References:

- S1. G. A. Crosby and J. N. Demas, *J. Am. Chem. Soc.*, 1970, **92**, 7262–7270.
- S2. G. A. Crosby and J. N. Demas, *J. Am. Chem. Soc.*, 1971, **93**, 2841–2847.

**Table S3** Determination of photoluminescence quantum yield of **Ag<sub>11</sub>** and **Cu<sub>x</sub>Ag<sub>11-x</sub>**.

|                                        | solvent                | Absorbance (A) | Integrated emission intensity (F) | F/A (*10 <sup>12</sup> ) | Quantum Yield (Φ)       | Average Quantum Yield (Φ) | Film Quantum Yield (Φ <sub>Film</sub> ) |
|----------------------------------------|------------------------|----------------|-----------------------------------|--------------------------|-------------------------|---------------------------|-----------------------------------------|
| [Ru(bpy) <sub>3</sub> ] <sup>2+</sup>  | Alcohol <sup>[a]</sup> | 0.7076         | 1.570E+12                         | 2.21                     |                         |                           |                                         |
| [Ru(bpy) <sub>3</sub> ] <sup>2+</sup>  | Alcohol <sup>[a]</sup> | 0.7034         | 1.568E+12                         | 2.229                    | 0.089 <sup>[b][c]</sup> | 0.089 <sup>[b][c]</sup>   |                                         |
| [Ru(bpy) <sub>3</sub> ] <sup>2+</sup>  | Alcohol <sup>[a]</sup> | 0.6828         | 1.247E+12                         | 1.826                    |                         |                           |                                         |
| <b>Ag<sub>11</sub></b>                 | 2-MeTHF                | 0.8156         | 2.81E+12                          | 3.45                     | 0.153 <sup>[c]</sup>    |                           |                                         |
| <b>Ag<sub>11</sub></b>                 | 2-MeTHF                | 0.7885         | 2.814E+12                         | 3.57                     | 0.157 <sup>[c]</sup>    | 0.146 <sup>[c]</sup>      | 0.372 <sup>[d]</sup>                    |
| <b>Ag<sub>11</sub></b>                 | 2-MeTHF                | 0.8291         | 1.975E+12                         | 1.826                    | 0.129 <sup>[c]</sup>    |                           |                                         |
|                                        | solvent                | Absorbance (A) | Integrated emission intensity (F) | F/A (*10 <sup>8</sup> )  | Quantum Yield (Φ)       | Average Quantum Yield (Φ) | Film Quantum Yield (Φ <sub>Film</sub> ) |
| [Ru(bpy) <sub>3</sub> ] <sup>2+</sup>  | H <sub>2</sub> O       | 0.0867         | 6.42E+8                           | 74.09                    |                         |                           |                                         |
| [Ru(bpy) <sub>3</sub> ] <sup>2+</sup>  | H <sub>2</sub> O       | 0.0854         | 6.04E+8                           | 70.72                    | 0.063 <sup>[c][e]</sup> | 0.063 <sup>[c][e]</sup>   |                                         |
| <b>Cu<sub>x</sub>Ag<sub>11-x</sub></b> | 2-MeTHF                | 0.0645         | 8.12E+8                           | 83.13                    | 0.080 <sup>[c]</sup>    |                           |                                         |
| <b>Cu<sub>x</sub>Ag<sub>11-x</sub></b> | 2-MeTHF                | 0.0636         | 8.18E+8                           | 78.34                    | 0.075 <sup>[c]</sup>    | 0.078 <sup>[c]</sup>      | 0.161 <sup>[d]</sup>                    |

<sup>[a]</sup> ethanol-methanol (v/v = 4:1). <sup>[b]</sup> *J. Chem. Soc., Perkin Trans. 2*, 1984, 1293-1301. <sup>[c]</sup> Degas. <sup>[d]</sup> PLQY was determined with the complexes in plastic (PMMA film) through an integrating sphere on FLS920 spectrometer. <sup>[e]</sup> *Phys. Chem. Chem. Phys.*, 2009, **11**, 9850-9860.
